# Supplementary material
Source: publisher figshare collection journal article supplement (https://acs.figshare.com/ndownloader/files/5028661)
Supplement: Supplementary file 1 [file 5028661]

## **Supporting Information**

### **Heterogeneous Photochemical Conversion of NO<sub>2</sub> to HONO on the Humic Acid**

#### **Surface under Simulated Sunlight**

Chong Han,\* Wangjin Yang, Qianqian Wu, He Yang, and Xiangxin Xue

School of Metallurgy, Northeastern University, Shenyang, Liaoning 110819, People's

Republic of China

\*To Whom Correspondence Should Be Addressed:

E-mail address: hanch@smm.neu.edu.cn

Phone: +86-024-83684086

Fax: +86-024-83687719

#### **Summary**

Five pages, including 4 figures and text about the trapping of HONO by a quartz tube filled with Na<sub>2</sub>CO<sub>3</sub>.

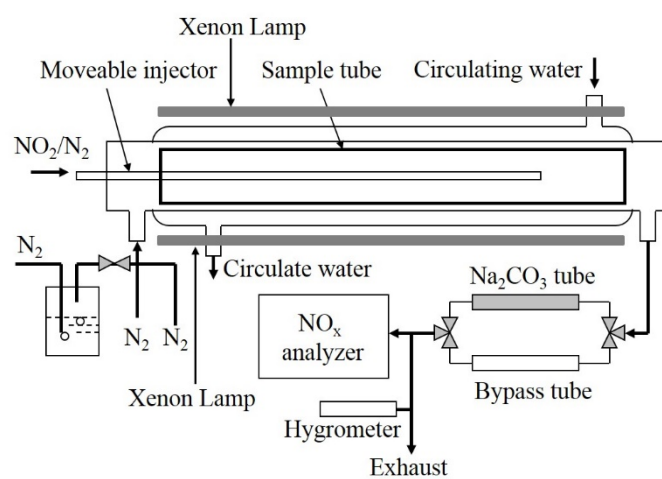

Figure S1. Diagram of the flow tube reactor

We have investigated the trapping of HONO by a quartz tube (10 cm length and 0.6 cm inner diameter) filled with 1.0 g of crystalline  $\text{Na}_2\text{CO}_3$ . Gaseous HONO was produced by the heterogeneous reaction of HCl with  $\text{NaNO}_2$  ( $\text{HCl} + \text{NaNO}_2 \rightarrow \text{HONO} + \text{NaCl}$ ),<sup>[1]</sup> where HCl diluted in  $\text{N}_2$  passed through a column containing  $\text{NaNO}_2$  crystals. Caused by its quantitative interference, HONO was measured from the  $\text{NO}_2$  signal of the  $\text{NO}_x$  analyzer (Thermo 42i). As shown in Figure S2, the HONO concentration was 30 ppb by a bypass tube while only negligible HONO was observed using a quartz tube (10 cm length and 0.6 cm inner diameter) filled with 1.0 g of crystalline  $\text{Na}_2\text{CO}_3$ . The trapping efficiency of HONO by this  $\text{Na}_2\text{CO}_3$  tube was higher than 99% at the steady state.

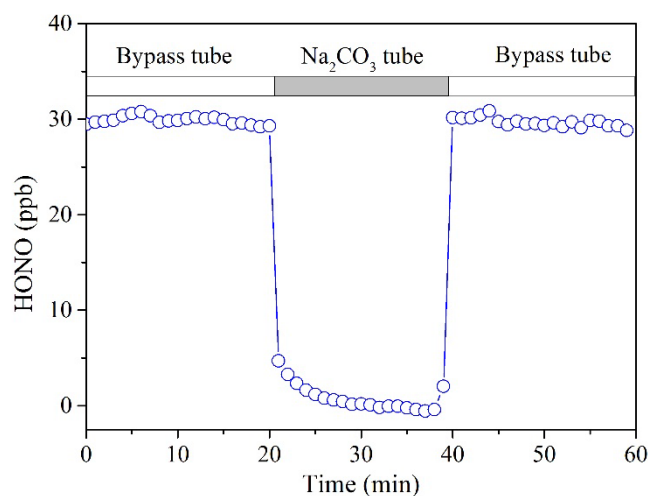

Figure S2. Trapping of HONO by a quartz tube (10 cm length and 0.6 cm inner diameter) filled with crystalline  $\text{Na}_2\text{CO}_3$  of 1.0 g

## Reference

- (1) Febo, A.; Perrino, C.; Gherardi, M; Sparapani, B., Evaluation of a High-Purity and High-Stability Continuous Generation System for Nitrous Acid. *Environ. Sci. Technol.* **1995**, 29, 2390-2395.

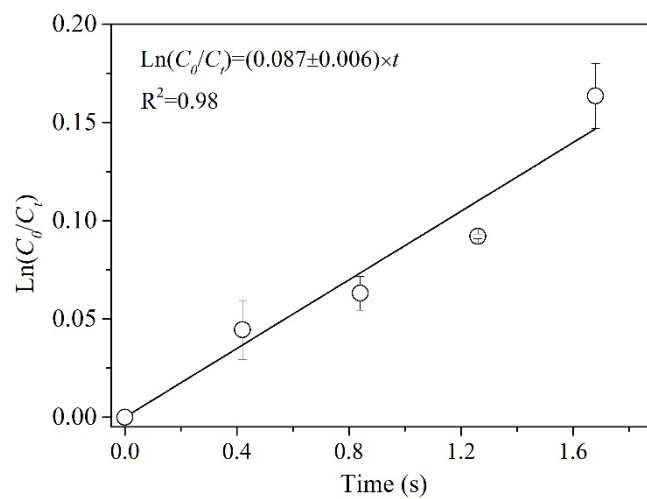

Figure S3. Determination of the linearity of  $\ln(C_0/C_t)$  against  $t$  by varying the length of the HA coating in contact with  $\text{NO}_2$ , which is equivalent to vary the reaction time.

Reaction conditions: irradiation intensity of  $194.5 \text{ W/m}^2$ , HA mass of  $15.9 \text{ }\mu\text{g/cm}^2$ ,

$\text{NO}_2$  concentration of 30 ppb, temperature of 298 K, and RH of 22%.

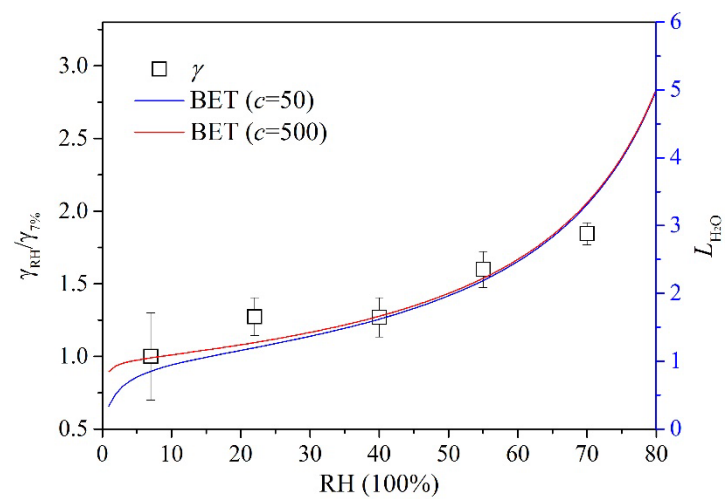

Figure S4. Relative enhancement ( $\gamma_{RH}/\gamma_{7\%}$ ) of  $\gamma$  and equivalent layer numbers ( $L_{H_2O}$ ) of water at different RH. Blue and red lines represent BET isotherms of water ( $L_{H_2O}$ ) at  $c=50$  and  $500$ , respectively.
